# Supplementary material for: Self-assembly of phosphorescent quantum dots/boronic-acid-substituted viologen nanohybrids based on photoinduced electron transfer for glucose detection in aqueous solution
Source: Royal Society of Chemistry journal article supplement (doi:10.1039/c5ra19911e), 2016-01-01
Supplement: c5ra19911e1.pdf [file c5ra19911e1.pdf]

1 **Supplementary Materials:**

2

3

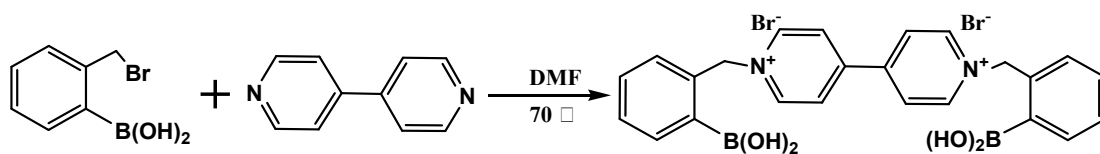

4 **Fig. S1.** The synthetic scheme of BBV.

5

6

7

8

9

10

11

12

13

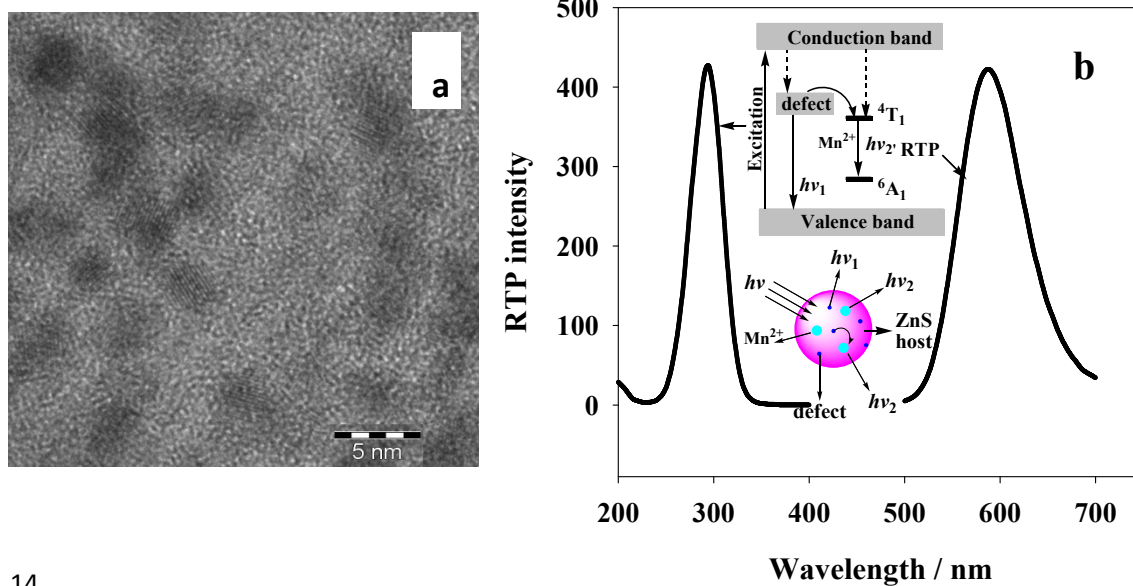

14

15 **Fig. S2.** (a)TEM image of MPA-capped Mn-doped ZnS QDs. (b) The excitation and  
 16 RTP emission spectra of Mn-doped ZnS QDs (40 mg L<sup>-1</sup>). Solutions were prepared in  
 17 PBS (10 mM, pH 7.4).

18

19

20

21

22

23

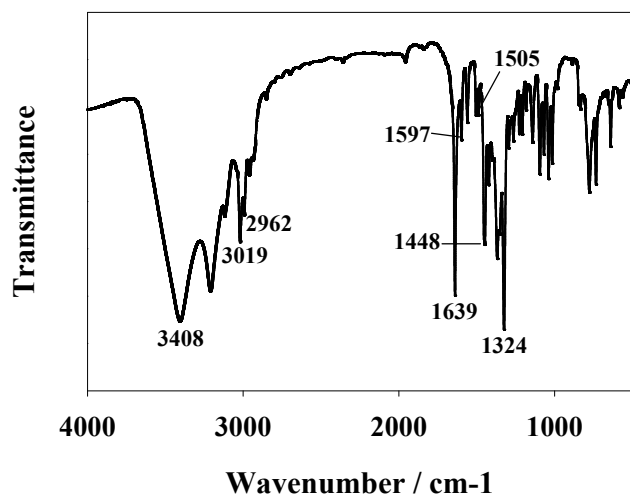

24

25

**Fig. S3.** FT-IR spectra of BBV.

26

27

28

29

30

31

32

33

34

35

36

37

38

39

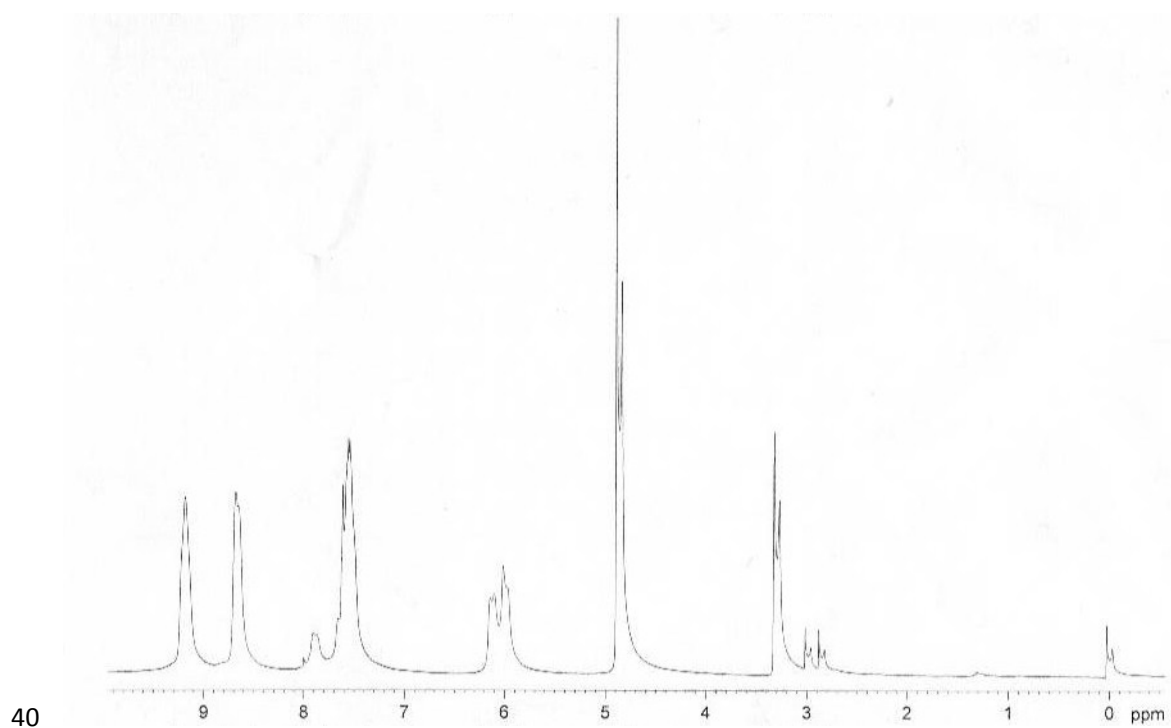

40

**Fig. S4.**  $^1\text{H}$  NMR spectra of BBV.

41

42

43

44

45

46

47

48

49

50

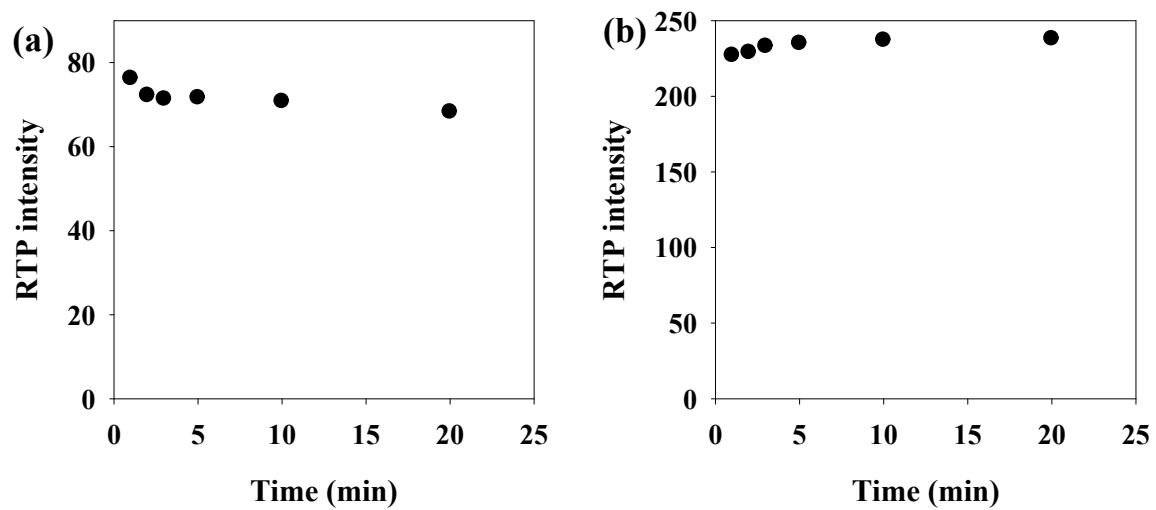

51

52 **Fig. S5.** (a) Time-dependent RTP emission of the Mn-doped ZnS QDs and DXR; (b)

53 Time-dependent RTP emission of the Mn-doped ZnS QDs/DXR and glucose..

54

55
